# Supplementary material for: Development of a continuous UAV-mounted air sampler and application to the quantification of CO 2 and CH 4 emissions from a major coking plant
Source: Copernicus journal article supplement (doi:10.5194/amt-17-677-2024), 2024-01-29
Supplement: Supplementary file 1 [file amt-17-677-2024-supplement.pdf]

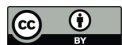

*Supplement of*

## **Development of a continuous UAV-mounted air sampler and application to the quantification of CO<sub>2</sub> and CH<sub>4</sub> emissions from a major coking plant**

**Tianran Han et al.**

*Correspondence to:* Shao-Meng Li ([shaomeng.li@pku.edu.cn](mailto:shaomeng.li@pku.edu.cn))

The copyright of individual parts of the supplement might differ from the article licence.

1 **Section SI-1. Evaluation of CO<sub>2</sub> emissions through carbon material balance**

2 Figure S1 illustrates the coking process flow and the structure of a coking oven. Coking is a process in  
3 which coking coal is heated in an oxygen-free environment to produce coke, a high-carbon metallurgical  
4 coke used in steel production. The process takes place in a coke oven, where coking coal is heated at  
5 temperatures exceeding 1000 °C, driving off all volatile components of the coal and leaving behind coke.  
6 Coke oven gas (COG), the byproduct of coking, is mainly composed of the components listed in Table  
7 S1 (Razzaq et al., 2013). This gas is recovered and mostly reused as fuel in firing the coke oven to  
8 maintain the high temperatures needed for coking (Zhang, 2019), reducing/eliminating the need for  
9 external fuel sources. However, burning COG generates CO<sub>2</sub>, which is the primary waste gas emitted.

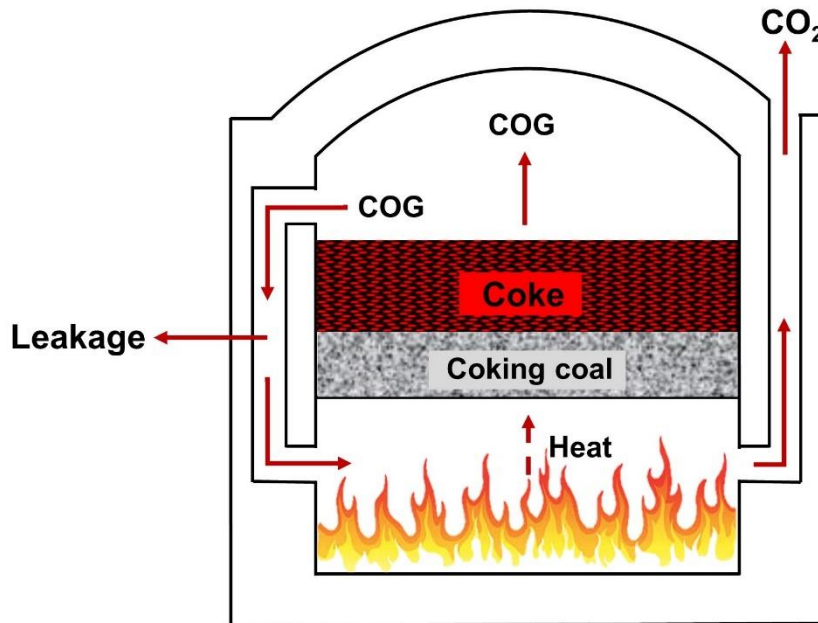

10

11

**Figure S1.** The conceptual coking process flow and the structure of the coking oven

12

**Table S1.** Main carbon constituents and their corresponding compositions (vol%) in coke oven gas

| Component                     | Content |
|-------------------------------|---------|
| CH <sub>4</sub>               | 23~27%  |
| CO <sub>2</sub>               | 1.5~3%  |
| CO                            | 5~8%    |
| C <sub>2</sub> H <sub>4</sub> | 2~4%    |

13 The main products of coking are coke, COG, and slag. In Chinese coking plants (Zhang, 2019),  
 14 typically half of the produced COG is used as fuel in firing the coke oven, while a small portion is  
 15 recycled for producing chemical products, and the rest is either leaked (5 %) (Hein, 2012) or an unknown  
 16 fraction is directly released into the atmosphere. The Shagang coking plant has implemented a process  
 17 for recycling slag. This process involves reusing the slag, which is generated during the coking process,  
 18 as part of the fuel for the coking oven. As a result, the carbon in the slag is similarly oxidized into CO<sub>2</sub>  
 19 and subsequently released into the atmosphere as well. Therefore, the CO<sub>2</sub> emissions ( $E_{CO_2}$ ) mainly come  
 20 from the combustion of COG ( $E_{\text{combustion-COG}}$ ), the combustion of slag ( $E_{\text{combustion-slag}}$ ), and the direct  
 21 release of COG ( $E_{\text{release}}$ ):

$$22 \quad E_{CO_2} = E_{\text{combustion-COG}} + E_{\text{combustion-slag}} + E_{\text{release}} \quad (1)$$

23 Based on the carbon material balance, the amount of carbon in COG combusted in the coking oven  
 24 ( $C_{\text{combustion-COG}}$ ) during the coking process can be derived from material balance:

$$25 \quad C_{\text{combustion-COG}} = \alpha(C_{\text{coal}} - C_{\text{coke}} - C_{\text{slag}}) \quad (2)$$

26 where  $C_{\text{coal}}$  is the amount of carbon in coal,  $C_{\text{coke}}$  the amount in coke, and  $C_{\text{slag}}$  the amount in slag.  
 27  $\alpha$  is the fraction of COG used in firing the coking oven and is 0.5 based on operation data at the Shagang  
 28 coking plant. The measured coking plant consists of two coke oven batteries, each with its own stack.  
 29 According to the faculty at the coking plant, each coking oven battery produced 127.8 t coke hr<sup>-1</sup>, thus  
 30 totalling 255.6 t coke hr<sup>-1</sup> ( $p_{\text{coke}}$ ) between the two batteries during the UAV measurement period with a  
 31 coke yield of 78.5 %. The coking batteries are in continuous operation and the coking time (the time  
 32 from charging the coal to pushing of coke out of the oven) is 26 hours. Thus a 30-minute flight is a  
 33 suitable length of time for measurement and material balance analysis. The carbon content of coking coal  
 34 typically ranges from 80 % to 87 % (Dai et al., 2022). Assuming an average value of 83.5 %, the total  
 35 amount of carbon in the coking coal used by the coking plant per hour can be calculated as:

$$36 \quad C_{\text{coal}} = \frac{p_{\text{coke}}}{78.5\%} \times 83.5\% = 272 \text{ t C hr}^{-1} \quad (3)$$

37 according to the US EPA, metallurgical coke has a carbon content of 82 % to 87 % (U.S. Environmental  
 38 Protection Agency, 2008). If an average value of 84.5 % is taken, the produced carbon in the coke during  
 39 the coking process can be calculated as:

$$40 \quad C_{\text{coke}} = p_{\text{coke}} \times 84.5\% = 216 \text{ t C hr}^{-1} \quad (4)$$

41 Generally speaking, the yield of slag is 0.05 % to 0.07 % of the coal charged for coking process (an

42 average value of 0.06 % is taken here), and that the carbon content of slag is around 80 % (Li, 2022).

43 Thus, the total amount of carbon in the produced slag can be calculated as:

$$44 \quad C_{slag} = \frac{p_{coke}}{78.5\%} \times 0.06\% \times 80\% = 0.16 \text{ t C hr}^{-1} \quad (5)$$

45 by substituting Eq. (3), (4) and (5) into Eq. (2), the mass of carbon in the combusted COG

46 ( $C_{combustion-COG}$ ) during the coking process is calculated to be 27.9 t hr<sup>-1</sup>. Thus,  $E_{combustion-COG}$  and

47  $E_{combustion-slag}$  can be calculated respectively:

$$48 \quad E_{combustion-COG} = C_{combustion-COG} \times \frac{M_{CO_2}}{M_C} = 102.3 \text{ t CO}_2 \text{ hr}^{-1} \quad (6)$$

$$49 \quad E_{combustion-slag} = C_{slag} \times \frac{M_{CO_2}}{M_C} = 0.59 \text{ t CO}_2 \text{ hr}^{-1} \quad (7)$$

50 where  $M_{CO_2}$  and  $M_C$  is the molar mass of CO<sub>2</sub> and the atomic mass of carbon, respectively.

51 As certain amount of CO<sub>2</sub> is directly released into the atmosphere along with COG, the carbon mass in

52 the released and measured CO<sub>2</sub> ( $C_{release}$ ) can be derived as:

$$53 \quad C_{release} = \beta(C_{coal} - C_{coke} - C_{slag}) \times \frac{\varphi_{CO_2}}{\varphi_{CO_2} + \varphi_{CH_4} + \varphi_{CO} + 2\varphi_{C_2H_4}} = 0.16 \text{ t hr}^{-1} \quad (8)$$

54 where  $\beta$  is fraction of COG that is directly released into the atmosphere, taken to be 0.05 as described

55 above,  $\varphi_{CO_2}$ ,  $\varphi_{CH_4}$ ,  $\varphi_{CO}$ , and  $\varphi_{C_2H_4}$  are the volume fractions for the main constituents in COG (Table

56 S2). Thus, the corresponding CO<sub>2</sub> emissions from the direct release of COG ( $E_{release}$ ) can be derived as:

$$57 \quad E_{release} = C_{release} \times \frac{M_{CO_2}}{M_C} = 0.59 \text{ t CO}_2 \text{ hr}^{-1} \quad (9)$$

58 by substituting Eq. (6), (7) and (9) into Eq. (1), the total CO<sub>2</sub> emissions ( $E_{CO_2}$ ) from the full coking

59 process is calculated to be 103 t CO<sub>2</sub> hr<sup>-1</sup>.

60 Taking into account the variation in carbon content found in both coking coal and coke, the variation

61 in the fraction of COG used as fuel (assuming a range of 0.4 to 0.6), the uncertainty of slag yield, as well

62 as the range in the volume fraction of the main components of COG, the total uncertainty range of CO<sub>2</sub>

63 released into the atmosphere during the coking process can be estimated to be 31 % by the equation

64 below:

$$65 \quad \delta^2 = \delta_{C_{coal}}^2 + \delta_{C_{coke}}^2 + \delta_{COG \text{ as fuel}}^2 + \delta_{slag \text{ yield}}^2 + \delta_{volume \text{ fraction}}^2 \quad (10)$$

66 Thus, the total amount of CO<sub>2</sub> released into the atmosphere during the full coking process estimated  
67 from the coke production data is 103 ± 32 t CO<sub>2</sub> hr<sup>-1</sup>, which is consistent with the CO<sub>2</sub> emission results  
68 (110 ± 18 t CO<sub>2</sub> hr<sup>-1</sup>, see main text) from the current UAV-measurements, as shown in Figure S2.

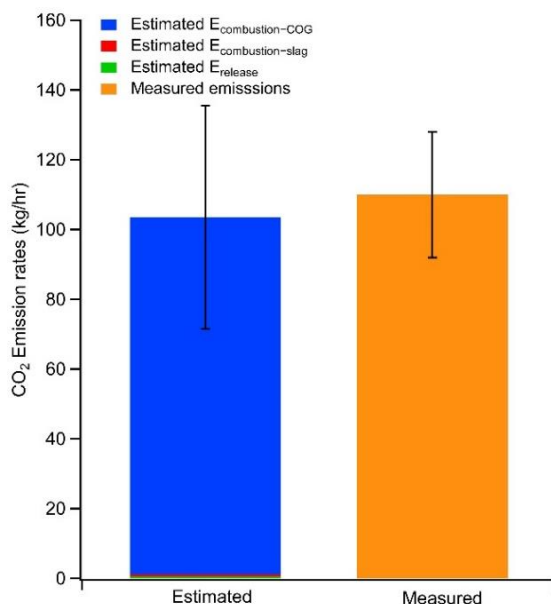

69 **Figure S2.** Comparison between the measured and estimated CO<sub>2</sub> emission rates from material balance

## 70 References

- 71 Dai, X., Li, D., Li, P., Liu, Y., Guo, D., Zhao, P., and Zhang, Y.: Characterization of microscopic structure  
72 and analysis of coking process for various coking coals, *Ironmaking Steelmaking*, 1-5,  
73 doi:10.1080/03019233.2022.2102886, 2022.
- 74 Hein, M. K., Manfred: *Environmental Control and Emission Reduction for Coking Plants*,  
75 doi:10.5772/48275, 2012.
- 76 Li, J. L., P.; She, X.; Tu, Z.; Wang, J.; Xue, Q.: Pyrolysis and kinetic analysis of tar residue, *Mod. Chem.*  
77 *Ind.*, 42, 108-118, doi:10.16606/j.cnki.issn0253-4320.2022.S2.024, 2022.
- 78 Razzaq, R., Li, C., and Zhang, S.: Coke oven gas: Availability, properties, purification, and utilization in  
79 China, *Fuel*, 113, 287-299, doi:10.1016/j.fuel.2013.05.070, 2013.
- 80 U.S. Environmental Protection Agency (EPA): 12.2 Coke Production Final May.  
81 [https://www.epa.gov/sites/default/files/2020-11/documents/c12s02\\_may08.pdf](https://www.epa.gov/sites/default/files/2020-11/documents/c12s02_may08.pdf), 2008
- 82 Zhang, Y.: Review on the Current Status of Coke Oven Gas Utilization in China, *Shandong Chem. Ind.*  
83 48, 172-173, doi:10.19319/j.cnki.issn.1008-021x.2019.16.072, 2019.
